# Supplementary material for: The Impact of Phototherapy on the Accuracy of Transcutaneous Bilirubin Measurements in Neonates: Optimal Measurement Site and Timing
Source: MDPI journal article supplement (doi:10.3390/diagnostics11091729), 2021-09-20
Supplement: s1 [file s1]

## Supplementary information

**Table S1.** Criteria of phototherapy.

### 1. Criteria of Phototherapy

| Days<br>Body weight/weeks                       | 0.5 | 1   | 2    | 3    | 4    | ≥ 5 |
|-------------------------------------------------|-----|-----|------|------|------|-----|
| <1000 gm                                        | 4   | 6   | 6    | 8    | 8    | 8   |
| 1000-2000 gm                                    | 6   | 8   | 10   | 12   | 12   | 12  |
| 2001-2499gm<br>or GA 35-36 <sup>6/7</sup> weeks | 6   | 8   | 11   | 13   | 14   | 15  |
| ≥ 2500gm<br>and GA ≥ 37 weeks                   | 7.8 | 9.9 | 13.1 | 15.5 | 17.5 | 18  |

### 2. Criteria of Intensive phototherapy

| Days<br>Body weight/weeks                       | 0.5 | 1  | 2  | 3  | 4  | ≥ 5 |
|-------------------------------------------------|-----|----|----|----|----|-----|
| <1000 gm                                        | 6   | 8  | 8  | 10 | 10 | 10  |
| 1000-2000 gm                                    | 7   | 9  | 11 | 13 | 15 | 15  |
| 2001-2499gm<br>or GA 35-36 <sup>6/7</sup> weeks | 8   | 10 | 13 | 15 | 17 | 18  |
| ≥ 2500gm<br>and GA ≥ 37 weeks                   | 9   | 12 | 15 | 18 | 20 | 21  |

### 3. Criteria of blood exchange transfusion

| Days<br>Body weight/weeks                       | 0.5 | 1    | 2  | 3  | 4  | ≥ 5 |
|-------------------------------------------------|-----|------|----|----|----|-----|
| <1000 gm                                        | 8   | 10   | 10 | 12 | 13 | 15  |
| 1000-2000 gm                                    | 10  | 12   | 15 | 17 | 17 | 17  |
| 2001-2499gm<br>or GA 35-36 <sup>6/7</sup> weeks | 13  | 14   | 17 | 21 | 21 | 21  |
| ≥ 2500gm<br>and GA ≥ 37 weeks                   | 15  | 16.5 | 19 | 24 | 25 | 25  |

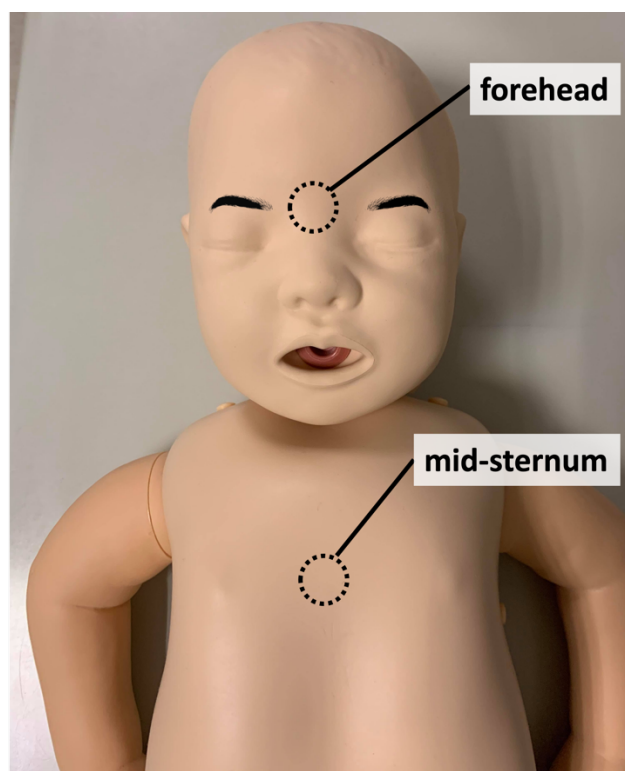

**Figure S1.** Schematic diagram of transcutaneous bilirubin measurement site.

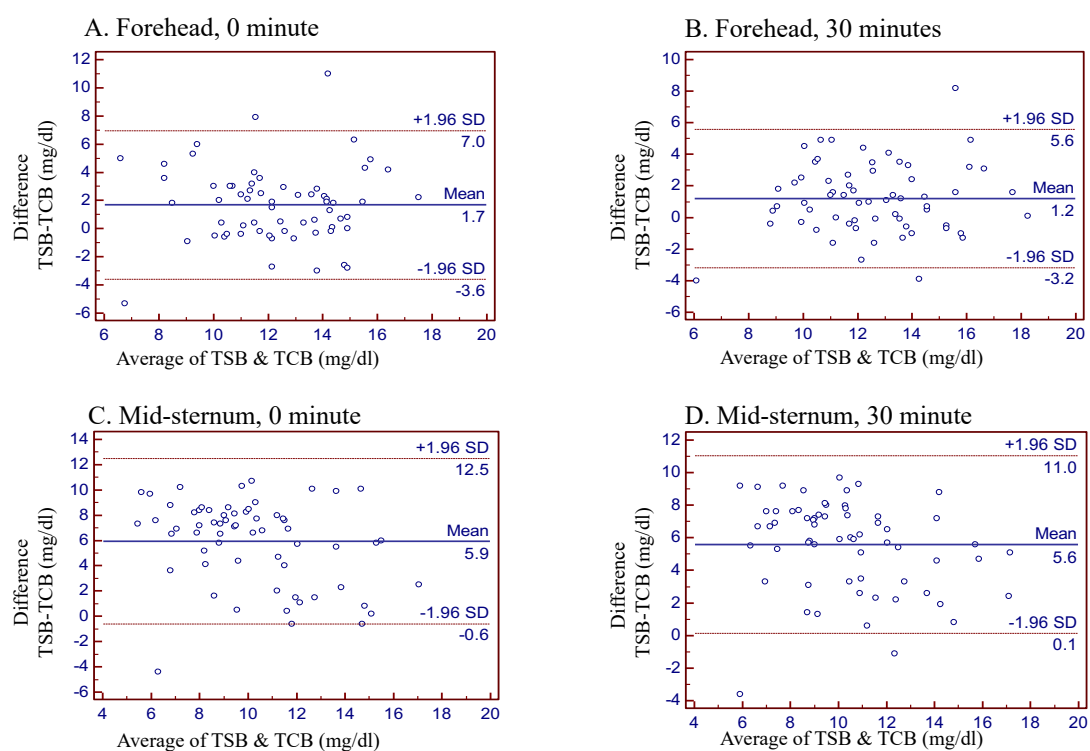

**Figure S2.** Bland-Altman plot for evaluation agreement between TCB and TSB measurements in term babies after phototherapy. (a) Forehead (0 min), (b) Forehead (30 mins), (c) Mid-sternum (0 min) and (d) Mid-sternum (30 mins).

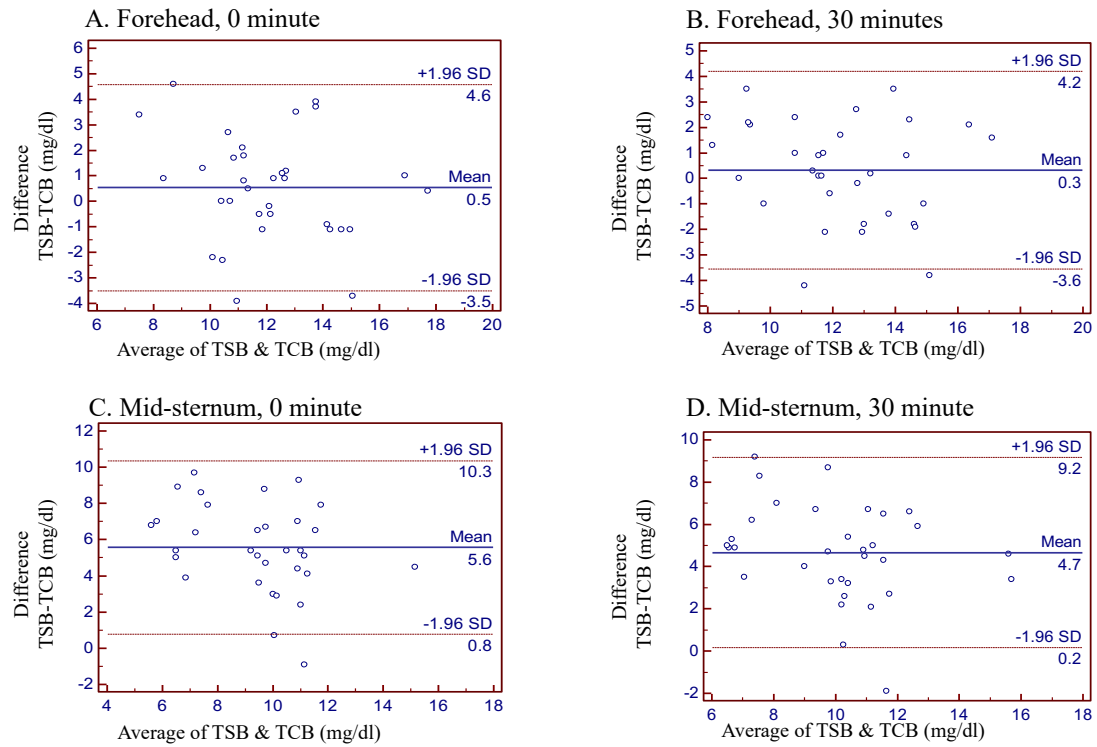

**Figure S3.** Bland-Altman plot for evaluation agreement between TCB and TSB measurements in preterm babies after phototherapy. (a) Forehead (0 min), (b) Forehead (30 mins), (c) Mid-sternum (0 min) and (d) Mid-sternum (30 mins).
